# Supplementary material for: Computing Climate-Smart Urban Land Use with the Integrated Urban Complexity Model (IUCm 1.0)
Source: Copernicus journal article supplement (doi:10.5194/gmd-2018-89), 2018-06-18
Supplement: Supplementary file 1 [file gmd-2018-89-supplement.pdf]

**Supplement to “Computing Climate-Smart Urban Land Use with the Integrated Urban Complexity Model (IUCm 1.0)”**

| <b>DOI &amp; link to movie</b>                                            | <b>Movie caption</b>                                                                                                                                                                                                          |
|---------------------------------------------------------------------------|-------------------------------------------------------------------------------------------------------------------------------------------------------------------------------------------------------------------------------|
| <a href="https://doi.org/10.5446/35429">https://doi.org/10.5446/35429</a> | Movie S1. Evolution of the application of growth to Frankfurt, with a probabilistic model setting, showing how it would growth 58,000 inhabitants, in steps of 1,000 inhabitants.                                             |
| <a href="https://doi.org/10.5446/35430">https://doi.org/10.5446/35430</a> | Movie S2. Evolution of the transformation of the idealized example of a polycentric city, with a probabilistic model setting, showing its transformation until 1M inhabitants would be moved, in steps of 1,000 inhabitants.  |
| <a href="https://doi.org/10.5446/35431">https://doi.org/10.5446/35431</a> | Movie S3. Evolution of the transformation of the idealized example of a monocentric city, with a probabilistic model setting, showing its transformation until 1M inhabitants would be moved, in steps of 1,000 inhabitants.  |
| <a href="https://doi.org/10.5446/35432">https://doi.org/10.5446/35432</a> | Movie S4. Evolution of the transformation of the idealized example of a high density city, with a probabilistic model setting, showing its transformation until 1M inhabitants would be moved, in steps of 1,000 inhabitants. |
