# Supplementary material for: Computing Climate-Smart Urban Land Use with the Integrated Urban Complexity Model (IUCm 1.0)
Source: Copernicus journal article supplement (doi:10.5194/gmd-2018-89), 2018-06-18
Supplement: Supplementary file [file gmd-2018-89-AC2-supplement.pdf]

1                                   **Computing Climate-Smart Urban Land Use with**  
2                                   **the Integrated Urban Complexity Model (IUCm 1.0)**

3                                   Roger Cremades<sup>1,\*</sup>, Philipp Sommer<sup>2</sup>

4   <sup>1</sup> Climate Service Center Germany (GERICS), Chilehaus Eingang B, Fischertwiete 1, 20095  
5 Hamburg, Germany.

6   <sup>2</sup>Institute of Earth Surface Dynamics (IDYST), University of Lausanne.

7   \*Correspondence to: [roger.cremades@hzg.de](mailto:roger.cremades@hzg.de).

8  
9   **Abstract**

10 Cities are fundamental to climate change mitigation, and although there is increasing  
11 understanding about the relationship between emissions and urban form, this relationship has not  
12 been used to provide planning advice for urban land use so far. Here we present the Integrated  
13 Urban Complexity model (IUCm 1.0), which computes climate-smart urban forms, which are  
14 able to cut in half emissions related to energy consumption from urban mobility. Furthermore,  
15 we show the complex features that go beyond the normal debates about urban sprawl vs.  
16 compactness. Our results show how to reinforce fractal hierarchies and population density  
17 clusters within climate risk constraints to significantly decrease the energy consumption of urban  
18 mobility. The new model that we present aims to produce new advice about how cities can  
19 combat climate change.

20   **1. Introduction**

21 Cities are crucial for a decarbonized society. Urban areas emit roughly three quarters of global  
22 carbon emissions (Seto et al., 2014). Cities are self-organized emergent structures with fractal  
23 qualities (Batty, 2007). They are classical examples of complex adaptive systems, which call for  
24 models combining spatial explicitness with a complex systems approach (White, 1998; Clarke et  
25 al., 1997).

26 The spatial distribution of urban land use and the density of population define the urban form.  
27 The debate in urban planning about the influence of population density and urban forms in  
28 mobility and derived energy is a long one. While some American-focussed analyses suggest that  
29 population density is not a primary determinant of energy-intensive forms of mobility (Ewing

1 and Cervero, 2010), other sources suggest that once the density is augmented, the reduction in  
2 the energy consumption of urban mobility is not immediate and take a longer time to realise (van  
3 Wee and Handy, 2014). Similarly, there is still a lack of complete understanding of the  
4 interaction between urban form and energy consumption and derived CO<sub>2</sub> emissions (Seto et al.,  
5 2014). Going beyond other approaches, Le Néchet (2012) suggests that, beyond density, the  
6 energy consumed in mobility is significantly correlated with the urban form, most specifically  
7 with measures of urban form related to a complexity science approach to density. The full  
8 potential of cities for mitigating climate change can only be achieved through considering the  
9 influence of the urban form on the energy needed for mobility. Hence, these measures of the  
10 urban form showing a significant correlation with energy consumption for mobility can be used  
11 to guide urban growth and transformation. Indeed, policy recommendations for the urban form in  
12 relation to energy consumption and derived CO<sub>2</sub> emissions have not been yet produced  
13 systematically, although it is clear that a lack of urban planning increases congestion and  
14 pollution (Moreno et al, 2016).

15 Furthermore, there is an opportunity to combine these spatially explicit insights about mitigation  
16 of CO<sub>2</sub> emissions from energy consumption for mobility with spatially explicit information of  
17 climate risks. We therefore aim to cover this gap in urban planning by producing a new type of  
18 spatially explicit model, a model that optimizes urban forms and is able to take into account  
19 climate risks. A model that should be designed to produce planning suggestions that decrease the  
20 energy consumption of urban mobility, and the derived emissions and pollution, while taking  
21 into account climate risks.

22 We present the first version of the Integrated Urban Complexity model (IUCm 1.0) and its first  
23 results, as a first step of an urban research agenda focussing on co-benefits between adaptation  
24 to, and mitigation of, climate change. The goals of this applied research agenda are to  
25 incorporate in urban planning the adaptation to the most important climate risks impacting cities,  
26 i.e. floods, droughts and heat island effect, while capturing the co-benefits with mitigation of  
27 greenhouse gas emissions leading to climate change and other forms of urban pollution. We find  
28 that the first results from this research agenda are already worth of consideration: a new type of  
29 urban planning advice providing spatially explicit insights on co-benefits between adaptation and  
30 mitigation shows in some cases a halving in the energy consumption of urban mobility while

1 constraining urban planning to flood risks (see Section 3.4 below). After the methods and results  
2 we present here, which include the IUCm 1.0 and its first results, the following steps of this  
3 agenda include (i) detail of urban transportation networks and infrastructures, (ii) detail of urban  
4 water supply and drought risks (Cremades, 2017), and (iii) 3-dimensional depiction of cities and  
5 land use and building covers to analyse heat-island effect together with a climate model.

6 In this IUCm 1.0, we drive the evolution of a cellular automaton model depicting the urban form,  
7 and initially use statistical evidence to capture its implications in the energy consumption of  
8 urban mobility. IUCm 1.0 provides a methodology to compute the first “climate-smart urban  
9 forms”, a novel concept in urban land use that has been applied to agriculture before (Lipper et  
10 al., 2014). We first apply IUCm 1.0 to three idealized city forms representing the planning  
11 challenges of diverse types of real cities, and then we apply this to a real example: Frankfurt.  
12 Rather than just suggesting the concentration of density in the city centre, climate-smart urban  
13 forms are characterized by strengthened density hierarchies and improved connections between  
14 urban clusters. We believe that applying our approach is crucial to the development of urban  
15 strategies for climate action.

## 16 **2. Methods**

### 17 **2.1. Introduction to the Integrated Urban Complexity model (IUCm 1.0)**

18 We propose a model with three major methodological constituents generating a new type of  
19 spatially explicit algorithm relating to changes in urban form with a decrease in the energy  
20 consumption of urban mobility, by combining cellular automata with an evidence-driven  
21 optimization process.

22 First, the energy needed for urban mobility is related to the urban form. The urban form can be  
23 quantitatively analysed via spatial entropy, average distance between citizens, and with the slope  
24 of the rank-size rule, amongst other factors. The slope of the rank-size regression line applied to  
25 a city measures intra-urban polycentricism (Le Néchet, 2012). The average distance of the  
26 population measures the degree of urban sprawl, which influences the distance to urban services  
27 and activities (work, commerce, health, education, leisure) and thus the energy needed to have  
28 access to them (Ewing, 2008). Spatial entropy measures how organized is the distribution of  
29 population within the urban space (Batty, 1974). Further details of these parameters are provided

1 below in Section 2.2.1. The contribution of these parameters to the energy consumption of urban  
2 mobility has been quantified with statistical regressions at a 1 km scale, showing the statistical  
3 significance of these relationships (Le Néchet, 2012).

4 Second, a multi-objective function to optimize urban forms is derived from the statistical  
5 evidence described above. This function reproduces the statistically significant influence of the  
6 above parameters on the energy consumption of urban mobility, using a probabilistic approach to  
7 deal with the uncertainties related to the parameters.

8 Third, a cellular automaton departs from the density of population for each cell of the urban land  
9 use at the scale measured by the statistical evidence. In each step of the cellular automaton model  
10 the simulated urban complex system evolves according to the rule of the multi-objective function  
11 above, to minimize the energy consumption of urban mobility, while constrained by information  
12 about climate risks and stakeholders' preferences.

13 To showcase how the IUCm 1.0 suggests the transformation of cities, it is first applied to three  
14 idealized city forms. Then the results are provided for a real example: the high density urban  
15 cluster formed by Frankfurt, Offenbach and connected urban areas of lower density.

16 The idealized city forms are used exclusively to show the model behaviour and represent the  
17 planning challenges of diverse types of real cities. The idealized city forms are (i) a polycentric  
18 city, (ii) a monocentric city with satellite towns, and (iii) a city characterized by a unique high  
19 density centre (Fig. 1). The polycentric city example presents challenges similar to those of  
20 Berlin while the challenges of the monocentric city form are in the same domain of those of  
21 Paris. The problems of the idealized dense city could be compared to those of Barcelona.

22 To illustrate the options in the model to incorporate information constraining the evolution of a  
23 city, in relation to climate change related risks, the transformation of Frankfurt and surrounding  
24 areas is constrained by the urban surfaces currently under a flood return period of 100 years. The  
25 population from those locations with non-manageable risk is relocated by IUCm 1.0 with the  
26 same principles above, thus achieving the lowest energy consumption of urban mobility.

27

1

2 **2.2. Model description**

3 The IUCm 1.0 integrates data and methods from a diversity of disciplines. So, the  
4 methodological components of the model are first outlined and then finally their combined  
5 functioning detailed.

6 **2.2.1.Evidence for the impact of urban form and density on the energy consumption**  
7 **of urban mobility**

8 Le Néchet (2012) provides significant statistical evidence of which urban morphological  
9 measures matter for the energy consumption of urban mobility in European cities; this evidence  
10 can be summarized in Table 1. The relevance in the objective function (Equation 1) of the urban  
11 morphological measures discussed in the article is weighted by the econometric results presented  
12 in Table 1 and calculated according to Equations 2, 3 and 4.

13 **Table 1.** Estimates of the urban form related determinants of energy consumption of urban mobility.

|                                        | Energy consumption of urban<br>mobility<br>[MJ/(inhabitant*year)] | Std. error<br>[MJ/(inhabitant*year)] |
|----------------------------------------|-------------------------------------------------------------------|--------------------------------------|
| Average distance between citizens [km] | 279****                                                           | 74.88                                |
| Spatial entropy [adimensional]         | 21700**                                                           | 9172                                 |
| Rank size slope [adimensional]         | -9340***                                                          | 2776                                 |

14 Notes: \*\*\*\*p<0.001, \*\*\*p<0.01, \*\* p<0.05, \* p<0.1

15 Source: Le Néchet (2012; priv. comm.).

16 Let  $E_T$  be the energy required for urban mobility,  $d$  the average distance between citizens,  $E$  the  
17 spatial entropy, and  $r$  the rank size slope (Table 1). Following Le Néchet (2012), whose  
18 estimations for energy required for urban mobility have a correlation with the observed values  
19 characterized by an  $R^2$  value of 0.56, we calculate the energy consumption via

20  $E_T = K + w_d d + w_E E + w_r r$  (1)

1 where  $w_x$  corresponds to the weight of the corresponding variable  $x$ . This weight is calculated  
2 from a normal distribution in the probabilistic setup through the mean of the weight and its  
3 standard error after Le Néchet (2012) (table 1); in the deterministic approach, only the mean of  
4 the weight is used.

5 The variable energy was obtained by the UITP (Union Internationale des Transports Publics or  
6 International Association of Public Transport) in their Mobility in Cities database through  
7 consultation with local authorities in each metropolitan area about each type of fuel or electricity  
8 consumed per each mobility type, as reported in local statistics in 2001, or by extrapolation of  
9 periodic surveys into 2001; the information was provided only for those cities where there was  
10 sufficient information.

11 The rank-size slope coefficient  $r$  is calculated via least squares minimization of the formula

$$12 \quad r \ln(k) = \ln\left(\frac{P_k}{P_{tot}}\right) \quad (2)$$

13 where  $P_k$  is the population of the  $k$ -th ranking cell and  $P_{tot}$  is the total population.

14 The slope of the rank-size rule indicates the degree of polycentricity. Cities with a uniform  
15 distribution of urban densities have values lower than 1, cities with pre-eminent cells with high  
16 density values (surpassing all other values) have values larger than 1 and cities with values close  
17 to 1 exhibit a rank-size relationship.

18 In this rank-size relationship the densities of each cell in the city follow an order characterized by  
19 a statistical relationship between the population density in the cell and the rank of population  
20 densities in the city's cells (Wong and Fotheringham, 1990), in which the number of cells within  
21 subsequent ranks of population densities decreases with higher density values.

22 Furthermore, the rank-size distribution has been described as a type of fractal model (Chen and  
23 Zhou, 2003). Indeed the rank-size distribution is equivalent to a fractal, self-similar hierarchical  
24 structure for a large number of ranks (Chen, 2012), and our model increases the number of ranks  
25 along the transformation of cities while making cities less homogeneous.

26 The next model variable, the entropy, is calculated via

$$1 \quad E = \frac{\sum_{i=1}^N \frac{P_i}{P_{tot}} \ln\left(\frac{P_i}{P_{tot}}\right)}{\ln(N)} \quad (3)$$

2 where  $N$  is the total number of cells in the city and  $P_i$  the population in cell  $i$ .

3 Entropy measures the degree of organization of the cities' densities. So, a perfect order of all  
 4 cells having the same density would give a value of 1, whilst having all the population in a single  
 5 cell would yield 0 (Batty, 1974; Le Néchet, 2012).

6 Finally, the average distance between citizens is calculated via

$$7 \quad d = \frac{\sum_{i,j=1}^N d_{ij} P_i P_j}{P_{tot}(P_{tot}-1)} \quad (4)$$

8 with  $d_{ij}$  representing the distance between the cells  $i$  and  $j$ .

9 The average distance between citizens is higher for large urban areas with citizens spread in low  
 10 density cells, and lower for smaller urban areas with higher densities.

### 11 **2.2.2. Portraying idealized urban forms**

12 The idealized city forms display the density of a population in square cells of 1 kilometre. All  
 13 their densities have been allocated randomly between 11,000 and 15,000 inhabitants per square  
 14 kilometre for the dense areas and between 1,000 and 4,000 inhabitants per square kilometre for  
 15 the immediate surroundings. The purpose of these city forms and their density values is to  
 16 display the behaviour of the model in connection to different types of cities. The density values  
 17 of idealized city forms are selected to represent high and low densities, and since they are part of  
 18 an idealized city these values follow random values within the ranges of high and low densities.

### 19 **2.2.3. Data for real urban forms and model transferability to other cities**

20 The data for Frankfurt, detailing its urban land use and the spatial distribution of its population,  
 21 comes from the Global Human Settlement Layer (Freire et al., 2015). The population grid of the  
 22 Global Human Settlement Layer provides the basis for characterizing urban forms and  
 23 population density globally, by combining data from remote sensing and population census, and  
 24 we use this grid at 1 kilometre of cell size. The urban area used in the real example is defined by

1 the settlement grid of the Global Human Settlement Layer, particularly from the high density  
2 cluster containing Frankfurt am Main, Offenbach am Main and the connected lower density  
3 urban areas. Because the products used from the Global Human Settlement Layer are freely  
4 available for the entire globe, and because there is evidence for the model for Europe, the  
5 application to this model to a European city can be done in an immediate basis, by adapting the  
6 format of the Global Human Settlement Layer to the requirements of the model. The model can  
7 be applied to European cities using the existing evidence as described in Equation (1) at Section  
8 2.2.1. This evidence is implemented in the code available as described in Section 6. The data  
9 about flood risks can be obtained from multiple urban and regional data servers about risk  
10 management local servers (e.g. the reference of data for the German federal State of Hessen can  
11 be found in Section 2.2.4). The data about the spatially explicit population density comes from  
12 the Global Human Settlement Layer, the product for 1 km of pixel size is freely available  
13 worldwide at <https://ghsl.jrc.ec.europa.eu>.

14 The mentioned high density cluster has been selected because of being (i) a large metropolitan  
15 area where the size of the pixels of the data of origin (1.000 meters) allow to a meaningful  
16 analysis, (ii) an area with an uncomplicated orography that would allow to present clearly the  
17 results of the first version of the model, and (iii) because of Frankfurt is an affluent city, with a  
18 higher likeliness of considering a large scale transformation or growth based on our insights.  
19 Finally (iv), choosing Frankfurt was convenient for institutional reasons related to the country of  
20 affiliation of the main author. The second reason (orography) thereby could appear as a  
21 confirmation bias (see Flyvbjerg, 2006) but this can safely be negated. The interpretation of the  
22 a-priori data would not allow a human to infer the results we present, especially the shape in the  
23 formation of hierarchies of densities and the halving of the energy consumption for urban  
24 mobility as presented in Section 3.

#### 25 **2.2.4.Data about flooding in urban areas**

26 The model allows to limit population from areas under risk of urban flooding, by limiting the  
27 population in those cells subject to flood risks, and if there is population exceeding the limit,  
28 move it to other cells following the model algorithm, as described below under caption  
29 “Functioning of the IUCm 1.0” (Section 2.2.9).



1 The model constrains the cells to a maximum of 15,000 inhabitants per square kilometer (see  
2 caption “Operations research” below, Section 2.2.5); in the case of areas with risk of floods, the  
3 cell suffers a decrease in the 15,000 maximum, proportional to the surface occupied by areas of  
4 flood risk in the cell.

5 The data for the simulated areas under flood risk for Frankfurt represent those surfaces under risk  
6 of floods with a recurrence interval of 100 years. This data is available via WFS Server  
7 (Geoportal Hessen, 2017).

### 8 **2.2.5.Operations research**

9 In each step of the evolution of the CA (see Section 2.2.7 below), the model performs a multi-  
10 objective spatially-explicit mathematical optimization routine, which is applied in a probabilistic  
11 setup that considers the uncertainties in the objective function (Equation (1) (see Section 2.2.6  
12 below), and in a deterministic setup. In both cases, the objective function is constrained in each  
13 cell to keep population values equal or below 15,000 inhabitants per square kilometer, reflecting  
14 suggestions about maximum density for urban sustainability from Lohrey and Creutzig (2016).

15 In the deterministic setup, the routine applied selects the next step in the transformation of the  
16 city that minimizes energy consumption as described in the objective function (for details see  
17 Section 2.2.9 below). Our model therefore defines an operations research (OR) spatially explicit  
18 problem.

### 19 **2.2.6.Probabilistic approach accounting for uncertainty**

20 The deterministic approach decides, based upon the weights of Le Néchet (2012) (table 1, first  
21 column), what is the scenario with the lowest energy consumption based upon equation (1).  
22 However, to account for the uncertainty in the weights from Le Néchet (2012) (standard errors in  
23 table 1), we also provide results from a probabilistic approach in the algorithm of the model.  
24 Instead of evaluating equation (1) for only the means in table 1, the probabilistic version draws  
25 1000 sets of weights, where each weight is drawn randomly from a normal distribution defined  
26 through the corresponding mean and standard error presented in table 1. This results in 1000  
27 (non-unique) cells that are candidates for the best scenario, one cell for each set of weights. The  
28 1000 inhabitants that are moved within one transformation step are then distributed equally

1 within the 1000 cells, i.e. the more often a cell is accounted for being the best scenario, the  
2 stronger the transformation is in this cell. In our simulations, the unique number of cells ranges  
3 from 1 to 18 for 1000 sets of weights.

#### 4 **2.2.7. Cellular automata (CA)**

5 CA are a set of spatially discrete cells, which evolve in temporal steps following certain rules.  
6 Those models display complex emergent behavior. CA have already been applied to urban  
7 contexts (Batty, 2007). The OR problem above represents a variation of CA, in which the  
8 concept of neighboring cells influencing the evolution of the CA is applied to all the cells  
9 representing the spatial distribution of the urban population at 1 kilometer of cell size. The  
10 discrete values of the cells evolve ranging between 0 and 15,000 (see Sections 2.2.2 and 2.2.5 for  
11 details). The rule defining the evolution of the CA is a mathematical optimization rule, which is  
12 the minimization of Equation 1.

#### 13 **2.2.8. Complexity in the IUCm 1.0**

14 The model currently includes two methodological aspects linked to complexity. First, rank size  
15 slope can be a measure of the fractal structure of a city. Rank size slope captures the multi-scale  
16 hierarchy of densities inside urban settlements. Second, CA is a method suited for modeling  
17 complex systems like cities (Batty, 2007; White, 1998; Clarke et al., 1997). CA allow the  
18 emergence of complex urban structures, and the combination of CA with a multi-objective  
19 function guides this emergence towards climate-smart urban forms. A third complexity aspect is  
20 planned, which involves network science applied to urban transportation in urban settlements.

#### 21 **2.2.9. Functioning of the IUCm 1.0**

22 Urban transformation is simulated with consecutive negative and positive changes in population  
23 of 1,000 inhabitants. This quantity is relatively small in comparison with the size of the modeled  
24 cities, and it has been chosen due to the computational constraints created by the time spent in  
25 the calculations included in the model. Each model step in the probabilistic setup follows the  
26 following algorithm:

27 I) Move out 1,000 inhabitants

- 1 i) For each set of the 1,000 sets of weights drawn (see probabilistic description in Section
- 2 2.2.6)
- 3 a) For each cell (representing one scenario)
- 4 (1) Move out 1,000 inhabitants (if possible)
- 5 (2) Calculate the energy consumption for this scenario using Equation (1)
- 6 b) Select the scenario with the lowest energy consumption
- 7 ii) For each cell from I)i)b), subtract 1 inhabitant, and because there are 1,000 sets of
- 8 weights, this action finally removes 1,000 inhabitants
- 9 II) Add 1,000 inhabitants
- 10 i) For each set of the 1,000 sets of weights drawn (see Section 2.2.6)
- 11 a) For each cell (representing one scenario)
- 12 (1) Add 1,000 inhabitants (if below the maximum population)
- 13 (2) Calculate the energy consumption for this scenario using Equation (1)
- 14 b) Select the scenario with the lowest energy consumption
- 15 ii) For each cell from II)i)b), add 1 inhabitant; similarly as in I)ii), this action finally adds
- 16 1,000 inhabitants
- 17 III) Continue with I)

18 The maximum population in step II)i)a)(1) is set to 15,000 inhabitants per each cell of a square  
19 kilometer. In cases with non-manageable climate risks related to riverine floods, this maximum  
20 population is decreased by a multiplication with the fraction of the grid cell that is not subject to  
21 non-manageable flood risk (see Section 2.2.4). With other risks, e.g. related to sea level rise, the  
22 procedure would be analogous.

23 The model also excludes areas covered by forests, green urban areas, water bodies, airports and  
24 port areas through the same principle as the flood risk, by decreasing the maximum allowed  
25 population through a multiplication with the fraction of the grid cell that is not covered by  
26 Forests, Green urban areas, etc. The data for these excluded areas comes from the European  
27 Urban Atlas (EEA, 2017).

28 Repeating the algorithm above allows us to simulate the transformation of the city towards a  
29 climate-smart urban form. This is achieved by moving out the population from those areas with

1 the highest energetic implications, and adding it to those areas with the lowest energetic  
2 implications, with constraints related to climate risks and potentially to all other aspects desired  
3 by planners and citizens, such as gardens, green corridors or areas with historical or other local  
4 values not subject to transformation.

### 5 **3. Results**

#### 6 **3.1. Application cases of the IUCm 1.0**

7 The IUCm 1.0 has three main applications: urban growth, urban transformation, and comparison  
8 of urban development plans. We provide results showing examples of urban growth and urban  
9 transformation for Frankfurt, and of urban transformation for idealised city forms to explore the  
10 functioning of the model.

11 The simplest application case is the comparison of urban development plans, the implications in  
12 urban densities of two or more possible urban development plans can be used to compute the  
13 related energy consumption for urban mobility as explained above (Section 2.2.9) while detailing  
14 the functioning of the IUCm 1.0, specifically its steps I)i)a)(2) can be used for calculating the  
15 energy for each of the alternative urban development plans and the step I)i)b) for comparing each  
16 of the plans.

17 In the application of urban growth, the initial scenario evolves optimising the progressive  
18 location of additional urban densities: in every step, the model suggests where would 1,000  
19 additional inhabitants have a lower impact on the energy consumption for urban mobility, so that  
20 from Section 2.2.9, only the step II) would be applied. An example of application for urban  
21 growth is presented below for Frankfurt in Section 3.3.3.

22 In the hypothetical application of urban transformation the model alternatively finds where to  
23 add density like in the application of urban growth above, and where to remove population  
24 density from those places with the highest impact on energy consumption for urban mobility, so  
25 there are alternate steps in which one step is like in urban growth, and another moves out the  
26 population density from somewhere else with the highest implications in energy consumption for  
27 urban mobility, proceeding as detailed above in Section 2.2.9. Two examples of applications of

1 urban transformation are presented, one for idealised city forms in the next section, and one for  
2 Frankfurt in Section 3.4.

### 3 **3.2. Results for idealized urban forms.**

4 For the solely purpose of making a preliminary analysis of the results of the IUCm 1.0, we  
5 created idealized urban forms and made an application of urban transformation to them. When  
6 simulating the transformation of the urban form, the population is moved out from those places  
7 that have higher energetic implications and added to those places with lower energetic  
8 implications. This is done with 1,000 inhabitants for each model step. The amount of people  
9 moved within the urban form reflects the degree of transformation (Fig. 1). The positive impacts  
10 of the transformation are visible in the reduction in energy consumption for urban mobility (Fig.  
11 2).

12 Overall, it is clear that the IUCm 1.0 reinforces existing and potential hierarchies of densities  
13 within the urban land use (see movies in the Supplementary Materials and Fig. 1). This effect is  
14 related to the slope of the rank-size regression line (Eq.1). The objective function optimizes the  
15 slope of the rank-size regression line (Eq.1) while making the city less homogeneous. In this way  
16 it produces urban forms with a higher fractal order, i.e. reinforces spatially scaled entities—in  
17 terms of density—inside the urban form, along the evolution of the cellular automata.

18 The IUCm 1.0 strengthens existing higher density urban clusters (Fig. 1), as a consequence of  
19 optimizing the spatial entropy and the average distance between citizens, which promotes the  
20 creation of higher density clusters. Overall, the low density areas surrounding the high density  
21 clusters are reduced, and some higher density features appear in the areas contacting with the  
22 central high density clusters. Besides, across the examples in Fig. 1, it can be consistently  
23 observed that the evolution of the cells keeps empty some spaces within the hierarchies of  
24 densities. This could be a consequence of the reinforced density on clusters and the enhancement  
25 of the fractal order. This implies that a mitigation-oriented urban space leaves ample room for  
26 designing adaptation-oriented measures in the urban form, such as air corridors and urban green  
27 areas.

1 There are also case-specific remarkable features (Fig. 1), the details and evolution of which are  
2 better observed in the movies accompanying this article (see movies in the Supplementary  
3 Materials). In the polycentric city the IUCm 1.0 creates and reinforces connections between  
4 higher density clusters, implying that it is possible to give advice on how polycentric cities can  
5 be further optimized. In the high density case, the initial dense centre characterized by a few cells  
6 with the highest density values is transformed into a complex hierarchy of high density clusters.  
7 In the monocentric case with satellite towns, the IUCm 1.0 emphasises existing hierarchies of  
8 higher density clusters and reinforces the connections between them, letting a more complex  
9 structure emerge. The sensitivity to the initial conditions make the model produce results that are  
10 unrelated in every example, just having in common an increased hierarchy of urban densities that  
11 mathematically corresponds with an increased fractal order.

12 With regard to the results in energy reduction, these follow an expected decrease on marginal  
13 returns along the transformation effort, especially when using the probabilistic approach (Figs. 2  
14 and 3). Also according to expectations, the high density case initially achieved lower energy  
15 consumption per capita values with less effort than other idealized city types (Fig. 2). In  
16 counterfactual terms, the moving average of the marginal change of the energy consumption  
17 along the transformation does not differ between the idealized city types (Fig. 3).

### 18 **3.3. Urban growth in Frankfurt: optimizing the location of urban densities for a 2030** 19 **population forecast.**

20 Applying the probabilistic setting to urban growth in Frankfurt, following the forecasted increase  
21 of 58,000 inhabitants projected by UN (2014) for the period 2015-2030, provides increase in  
22 densities in different parts of the high density cluster of Frankfurt metropolitan area (see Section  
23 2.2.3 for details). The location of these increased densities in the results are strongly determined  
24 by the constraints introduced in the model, namely areas under risk of floods with a return period  
25 of 100 years and green urban areas and water bodies, i.a. (see Section 2.2.4 for details). The  
26 impact on these areas is visible in Movie 1 (see Supplementary Materials), where in the left side  
27 it is shown the result of an unconstrained model run not taking into account these constraints,  
28 and in the right side it is shown the result of a model run that takes into account these flood risks

1 and other important urban infrastructure, which can also alleviate climate impacts related to heat  
2 island effect, like in the case of urban green areas.

3 The rapid increase in the value of the slope of the rank size rule (Figure 6) suggest the  
4 application of the IUCm 1.0 to urban growth can have rapid and positive effects, by suggesting  
5 where to improve the policentricity of an urban settlement. Figures 4 and 5 show milder impacts  
6 on the values of average distance between citizens and spatial entropy, respectively.

7 Comparing the smoothness of the lines in Figures 4, 5 and 6 with the energy display in Movie 1  
8 (see Supplementary Materials), the more irregular value shown in the video corresponds to the  
9 probabilistic setting picking the weights as explained in Section 2.2.6. Nonetheless, very  
10 importantly we can see that the video show how in both cases, the model is able to find locations  
11 for increasing population density that produce a lower energy consumption for urban mobility  
12 per capita. The quantity reduction in energy for urban mobility per capita is roughly of 1 GJ per  
13 year in both cases, with a final value of 17.7 GJ per capita and per year for the constrained  
14 simulation. It is noteworthy that the constraints in the simulation do not limit the opportunities  
15 for energy reduction, they just drive a different solution, at least for a relatively small increase of  
16 58,000 inhabitants.

### 17 **3.4. Results of a hypothetical transformation of the urban form of Frankfurt** 18 **metropolitan area.**

19 We first analyse the resulting values for average distance between citizen, spatial entropy, and  
20 rank size slope in the probabilistic model run of the Frankfurt example depicted in Figure 5. The  
21 model reduces the average distance between citizens from 12.01 to 6.54, which significantly  
22 decreases the urban sprawl. The spatial entropy is reduced from 0.92 to 0.72, which shows that  
23 the homogeneity of the density of the cells has been reduced. Finally, the slope of the rank-size  
24 rule increased from 0.34 to 0.96, close to 1, which improves the polycentric properties of the  
25 city. It also improves the order of the rank-size relationship of the population density of all city  
26 cells, creating rank-ordered fractal hierarchies without a high degree of primacy.

27 In the application of urban transformation to the urban form of Frankfurt the reduction goes  
28 beyond a remarkable 50% using the probabilistic approach (Fig. 7 and Fig. 8), the minima of the

1 deterministic approach in Fig. 7 appears to be related to non-convexities in the solution space of  
2 the optimization process.

3 Still, the influence of climate-smart urban forms goes beyond 50% reduction. Indeed, other  
4 policies to pull (e.g. improvement of mass transportation systems) and push (congestion charges)  
5 a reduction in emissions from transportation require supportive urban forms in order to succeed  
6 (Combs and Rodríguez, 2014; Noordegraaf, Annema, and van Wee, 2014).

#### 7 **4. Discussion**

8 The presented IUCm 1.0 drives the emergence of reinforced density hierarchies and higher  
9 density clusters within urban planning. This new fractal order of hierarchies and connected  
10 clusters, which depart from the existing city, goes beyond the sprawl vs. compact city debate.  
11 This suggests that neither linear planning nor unique centre-periphery logic should be considered  
12 for making a city sustainable and that policy recommendations about urban forms are only  
13 conceivable when modelling the city as a data-driven spatially-explicit complex system.

14 The feasibility of the urban growth application suggested above is especially high for fast  
15 growing cities expanding beyond their current centre, and also the idea of urban densification for  
16 existing centres seems feasible, as it is not a new concept in the scientific literature (Jenks and  
17 Burgess, 2000; Fregolent et al., 2017). After this experimental case, in a real application the  
18 preferences of the urban stakeholders and additional climate risks, like the urban heat island  
19 effect, are a must to be considered. In a real application of our model for urban growth, the cases  
20 so far discussed with policy makers relate to (i) a large number of small areas with opportunities  
21 for development and densification spread in a metropolitan area, and (ii) an application to choose  
22 between a set of different planning alternatives. In these contexts, what is the meaning of step-  
23 by-step model results that provide policy recommendations for urban growth? In the second case  
24 just mentioned, what matters would be the result in energy consumption computed by the step  
25 I)i)a)(2) of the algorithm in Section 2.2.9. In the first case, which appears to be a topical situation  
26 in urban planning, the model would provide density suggestions that would help policy-makers  
27 to plan the city for an increased population figure, however, the precise order of the step-wise  
28 results would matter much less for the policy-makers than the suggested densities and their  
29 location in space.



1 The feasibility of the type of transformation we suggest is seemingly low, at least in the short  
2 term, however it is supported by literature about the abandonment of human settlements  
3 (Schilling and Logan, 2008), and the relocation of human settlements in both the developed and  
4 the developing world. Outstanding amongst these relocation examples are cases of entire towns  
5 relocating far away within a decadal time scale with a rationale unrelated to global public  
6 interests but to the mining industry, like Malmberget and part of Kiruna in Sweden (Nilsson,  
7 2010), Picher, Cardin, and Hockerville in the United States (Shriver and Kennedy, 2005), or  
8 Leigh Creek in Australia (Robertson and Blackwell, 2016).

9 The debate on relocation in relation to adaptation to climate change is significant in many world  
10 regions (the Arctic, Florida, Mozambique and the South Pacific, i.a.), and although a negative  
11 view prevails at the national level, at the local level relocation has become an adaptation and  
12 resilience tool for entire communities. Furthermore, planned anticipatory relocations show higher  
13 signs of success than reactive relocations (Petz, 2015). In some cases, relocation is not only seen  
14 as a tool for adaptation, but also as an opportunity (McNamara et al., 2016). Urban relocation in  
15 relation to mitigation of emissions is not explicitly discussed in the literature, but it is implicit in  
16 research pointing out that urban form can contribute to mitigation (see Seto et al., 2014).  
17 Densification is also implicit in debates about how much arable land could be kept by avoiding  
18 future increases in urban land (Bren d'Amour et al., 2017). To summarise: the intra-urban  
19 relocation suggested by our application of urban transformation is feasible and can be an  
20 opportunity for synergies between SDGs.

21 Within the multi-level nature of urban decision-making framed e.g. by sub-national regions,  
22 metropolitan areas, municipalities and districts (Betsill and Bulkeley, 2006; Hooghe and Marks,  
23 2003), our planning suggestions for high density clusters and connected lower density urban  
24 areas provide an overall framework, which can be understood as a system of boundary  
25 conditions for other types of planning decisions at a finer spatial resolution.

26 In any case, the suggested densities should be implemented with the least energy intensive  
27 strategy and prioritizing citizen comfort. Both depend upon multiple interrelated factors, other  
28 than density, that correspond to lower scale decision levels that are beyond the scope of this  
29 study. These multiple factors include building expected lifetime, design, layout, height, shape,

1 materials and type of surface cover, integration with green and blue urban landscapes, orientation  
2 and size of the houses, all of which have significant impact both on the embodied and  
3 operational energies and on the personal preferences of inhabitants (Seto et al., 2014; Pan, 2014;  
4 Kennedy and Buys, 2010).

5 About the personal preferences of inhabitants, to limit negative externalities of high density, the  
6 model includes a limit of 15,000 inhabitants per square kilometer to avoid densities that are  
7 expected to create discomfort on urban inhabitants. Still, the local context or the preferences of  
8 the population about living in areas of higher density, as suggested by the results of the model,  
9 are not considered in the context of the normative results of our model. A possible avenue to  
10 consider these would be to discuss with local stakeholder the maximum density and the above  
11 factors leading to citizen comfort and livability that could make a difference to the local  
12 population. The preferences of stakeholders can be captured by participatory geographical  
13 information system (GIS) techniques enabling them to express where and how much the increase  
14 of densities should be limited. The underlying reasons of the prospective limitations are specific  
15 of every city and its idiosyncrasy: its cultural heritage areas, its history, and other multiple social,  
16 economic and environmental features could be sources of preferences for limitations in density  
17 and landscape change.

#### 18 **4.1. Implications for the Sustainable Development Goals (SDG) of the Agenda 2030**

19 The IUCm 1.0 adds information into the spatial distribution of population about how to reduce  
20 energy and therefore emissions of urban mobility. This delineates climate-smart urban forms, on  
21 the one hand using real-world evidence that connects urban land use with energy, thus mitigating  
22 GHG emissions, and on the other hand constraining the evolution of the city with spatial explicit  
23 information about non-manageable climate-related risks—e.g. floods or sea-level rise—like it is  
24 assumed in Frankfurt, and in that way adapting the city to climate change. Climate-smart urban  
25 forms provide policy guidance for the achievement of the SDG 11 (sustainable cities and  
26 communities), specifically its targets 11.3 “Sustainable human settlement planning” and 11.b on  
27 “Integrated policies and plans towards resource efficiency, mitigation [...]” (Nilsson et al.,  
28 2016).

1 Beyond its implications on SDG 11, we analyse climate-smart urban forms in the light of the  
2 other SDGs to understand the interactions with the diversity of goals of a sustainable city.  
3 Further direct implications appear on climate action (SDG 13), reduced energy consumption  
4 (SDG 7), and reduced air pollution (SDG 3). There is room for co-benefits facilitated by urban  
5 form in several cases: more land available for ecosystem services (SDG 15) and food production  
6 (SDG 2); decreased impermeable land surfaces implying less water pollution from urban runoff  
7 (SDG 14); information and communication technologies (SDG 9) supporting the pull and push  
8 policies mentioned above (see Section 3) e.g. with real time metering and charging per road use;  
9 and increased resource and infrastructure efficiency and higher economic productivity (SDG 8),  
10 the latter in relation to denser social networks (Pentland, 2014). It has been shown too that lack  
11 of urban planning contributes to worsen climate impacts (Eliasson, 2000), which have  
12 differential effects depending upon social status (USCGRP, 2014). So improving planning would  
13 ameliorate inequality (SDG 10). No substantial implications from our results were found on  
14 poverty (SDG 1), education (SDG 4), gender (SDG 5), and responsible consumption and  
15 production (SDG 12).

16 In relation to existing institutions and partnerships (SDGs 16 and 17), we found significant  
17 challenges to transform a city under current urban governance structures, which allow urban  
18 planning with short term objectives that produce unsustainable lock-ins (Neuens et al., 2013).  
19 Our innovative advice requires innovative governance approaches, which are necessary to  
20 achieve successful transformations in other sustainability domains (Loorbach, 2016). Rather than  
21 requesting that our normative results for Frankfurt should be implemented, we provide a new  
22 window of opportunity for urban sustainability, in which we put Frankfurt forward as an  
23 example for the potential of such transformation, namely halving the energy consumption for  
24 urban mobility per capita. Our results push forward current urban debates by challenging the  
25 ordinary way of thinking about cities, the actual sustainability potential of their existing  
26 institutions, the magnitude of their policy gaps, and the mindset of urban decision makers,  
27 practitioners and other stakeholders and policy partners.

## 28 **4.2. Outlook**

1 In financial terms, the usual Keynesian governmental investments on carbon intensive road  
2 infrastructure could be redirected here. Indeed, the potential micro and macro economic positive  
3 effects should be investigated in the future and compared with other types of Keynesian  
4 investments. A valuable experiment would be a combination of the IUCm results with a cost-  
5 benefit analysis. This could then inform policy makers where the suggested transformations of  
6 the IUCm should first take place. Additionally, from a scientific point of view, it would highlight  
7 the factors controlling the difference between a cost-benefit analysis and a model guided by a  
8 goal of resource efficiency. In order to provide this analysis, many of the environmental  
9 externalities and multiple factors detailed above in relation to the preferences of citizens would  
10 however need to be quantified and their interactions understood, in order to provide a full  
11 account of the benefits.

12 Carbon neutral and near-zero carbon building strategies show how savings in operational energy  
13 can offset embodied carbon in 50 years (Pan, 2014; Zuo et al., 2013), which together with further  
14 effects of density on decreased energy for domestic heating (Liu and Sweeney, 2012), suggests  
15 that the overall impact of the transformation could trigger further reductions in energy  
16 consumption. However a specific analysis using life-cycle techniques, taking into account the  
17 multiple factors mentioned above, would be necessary to understand how to improve the  
18 potential for minimizing energy consumption at lower scales.

19 We assume that the statistical relationship between urban form and energy consumption for  
20 urban mobility holds for the future as well, and to a degree, a change in this relationship could be  
21 captured by the probabilistic setup we are using. Because of this assumption, our results should  
22 be discussed also from the perspective of a possible future scenario of successful emissions  
23 reduction driven by automated shared-vehicles, either fed by an energy mix combining different  
24 sources and including fossil fuels, or fed 100% by renewable energies. Currently electricity is  
25 supplied by an energy mix combining different sources that includes fossil fuels, so in the case of  
26 a 100% renewables, our planning suggestions would still provide useful advice to further reclaim  
27 space from private mobility, making that space free for citizen use (Karsten and van Vliet,  
28 2006), whilst reducing other environmental impacts related to the production of renewable  
29 energies (Leung and Yang, 2012). Such future scenarios can be conceptualized with smart fees  
30 based on the time spent on the road (Raccuja, 2017).

1 This approach has limitations due to the low availability of data and econometric evidence for  
2 driving the IUCm 1.0 outside Europe, both on mitigation and on adaptation to climate change  
3 (UITP, 2015). Further global evidence should be produced that incorporates either the location of  
4 urban services or land use types. Once this evidence is created the model could be available for a  
5 practical application in other world regions.

6 Research should follow to improve the detail of the model and of the evidence driving it, mostly  
7 studying further detail of infrastructure, accessibility measures and transport systems, land use  
8 types and diversity of activities in land use mixes, and the 3-dimensional properties of cities. As  
9 mentioned above we plan to include further detail of urban transportation networks and  
10 infrastructures by applying network-based model to urban transportation in urban settlements, a  
11 deeper layer of information is planned to include infrastructures and transportation and street  
12 networks to improve how the model accounts for accessibility, and to extend the currently used  
13 information about population density with data of points of interest and of the location of jobs to  
14 proxy land use mixes, and to study the interaction of these factors with energy consumption as  
15 derived from network transit models. About the 3-dimensional properties of urban structures, a  
16 most realistic depiction of the urban heat island effect would require coupling with a low spatial  
17 resolution urban climate model able to analyse scenarios including 3-dimensional features and  
18 building covers, hence we plan a 3-dimensional representation of cities to model land use and  
19 building covers and analyse heat-island effect together with a climate model, which would allow  
20 us to suggest ventilation corridors and the use of vegetation in urban surfaces to reduce  
21 maximum temperatures and deal with an additional climate risks like the urban heat-island  
22 effect. These model developments are planned to integrate adaptation and mitigation at lower  
23 scales (Li et al., 2016; Koch et al. 2012).

24 Despite the limitations identified, the methodology that we present goes beyond current exercises  
25 on global change in urban areas, like the spatially explicit population scenarios launched  
26 consistently with the Shared Socioeconomic Pathways (Jones and O'Neill, 2016). So far these  
27 scenarios only consider the concentration of population versus sprawl, and leave out crucial  
28 considerations of polycentrism, fractals and complexity in urban forms when providing  
29 information about sustainability. Besides, combining both adaptation to and mitigation of climate  
30 change in urban plans and policies effectively in a qualitative way (without a quantitative

1 spatially explicit model) has proved to be a challenge leading to conflicting, rather than co-  
2 beneficial, outcomes (Hamin and Gurran, 2009). Summarizing, our planning advice is based on  
3 significant statistical measures relating the urban form with the energy consumption for urban  
4 mobility, and suggests the most efficient way of making urban forms not only more dense, but  
5 also less homogeneous and more fractal-like, whilst constrained by climate change related risks.

## 6 **5. Conclusions**

7 Whilst it is widely accepted that lack of urban planning increases congestion and pollution, urban  
8 planners aiming to transform cities and decrease greenhouse gas emissions require spatially  
9 explicit policy recommendations for decreasing urban energy for urban mobility.

10 Delivering climate-smart guidance on urban land use planning is a major step towards urban  
11 sustainability and will significantly help the efforts of cities to combat climate change. Our  
12 unique results show how to put into operation complexity and intra-urban polycentrism for the  
13 design of climate-smart urban forms that question the simplicity of the sprawl vs. compact city  
14 debate. In this regard, the reinforced fractal order within climate risk constraints, the multiplicity  
15 of clusters, and the existing lower density spaces in between, are emergent features that go  
16 beyond that debate.

17 Our approach presents a new tool for improved urban planning and is crucial to the development  
18 of mitigation strategies for cities, as required by the New Urban Agenda adopted after the United  
19 Nations Conference on Housing and Sustainable Urban Development (Moreno et al, 2016).  
20 Climate-smart urban forms are essential if cities are to achieve the 11th Sustainable  
21 Development Goal, related to Sustainable Cities and Communities (SDG 11). Further research  
22 should incorporate more climate-related risks, an improved urban depiction (including 3-  
23 dimensional structures), urban services, and the urban planning nexus of climate change and  
24 inequality.

## 25 **6. Code availability**

26 IUCm 1.0 is an open source software, and the code and complete documentation are available at  
27 <https://github.com/Chilipp/iucm> (a DOI will be generated using Zenodo when the paper is  
28 accepted). The model is written in Python mainly using the numerical python libraries numpy  
29 and scipy (Jones et al., 2001), statsmodels (Seabold and Perktold, 2010), as well as matplotlib

1 (Hunter, 2007) and pyplot (Sommer, 2017) for the visualization. Detailed installation  
2 instructions can be found in the user manual: <https://iucm.readthedocs.io>.

3

4

5

1 **Acknowledgments:** The authors wish to express their gratitude to Youba Sokona, Hermann  
2 Held, Diego Rybski, Jürgen P. Kropp, Wolfgang Lucht, and Andreas Haensler for their helpful  
3 comments. The authors thank Florent Le Néchet for the provision of further statistical details  
4 about his publications. The authors also thank Walter Sauf for his support on using the facilities  
5 of the German Supercomputing Center (DKRZ). PS gratefully acknowledges funding from the  
6 Swiss National Science Foundation (SNF). RC gratefully acknowledges support from the Earth-  
7 Doc programme of the Earth League.

8  
9



1 **Figures**

2

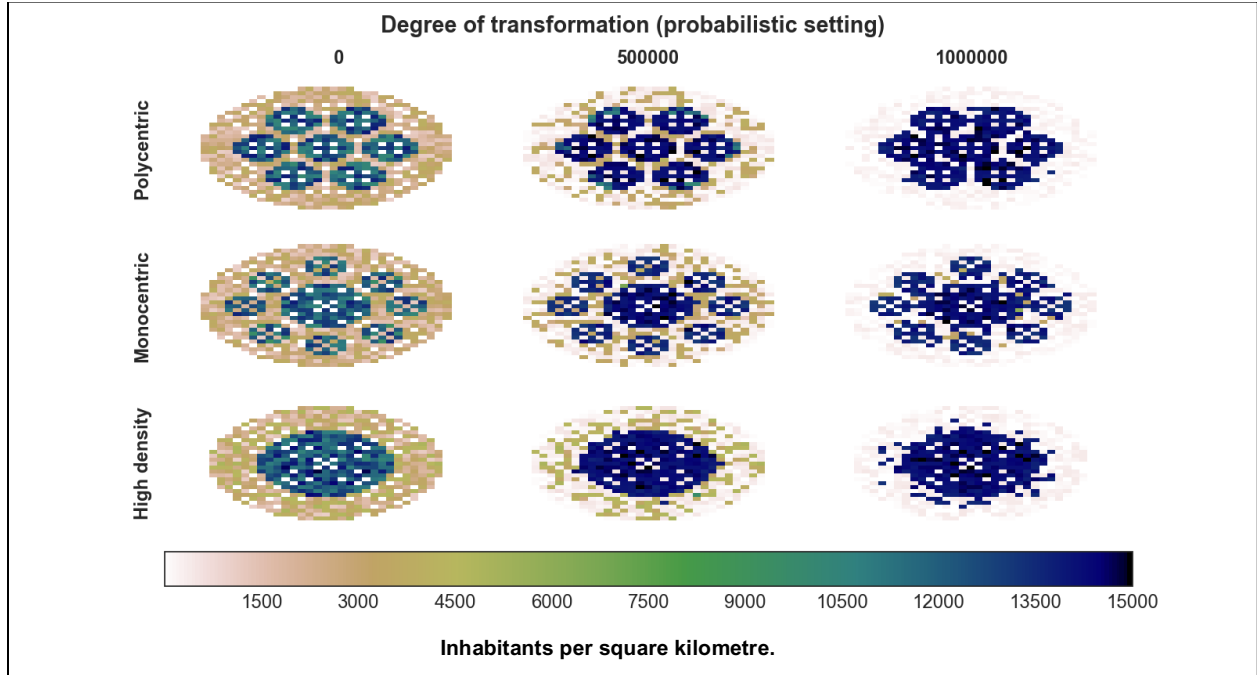

3

4 **Fig. 1.** The evolution of each of the three idealized cities using the probabilistic approach departs  
5 from an initial state and undergoes a number of transformations in the urban form; the degree of  
6 transformation is measured by the amount of population that is moved to another cell with lower  
7 energetic implications. After the initial state, an intermediate state and the final state are shown,  
8 these are a small subset of the model steps that appear in the movies of the Supplementary  
9 Materials.

10

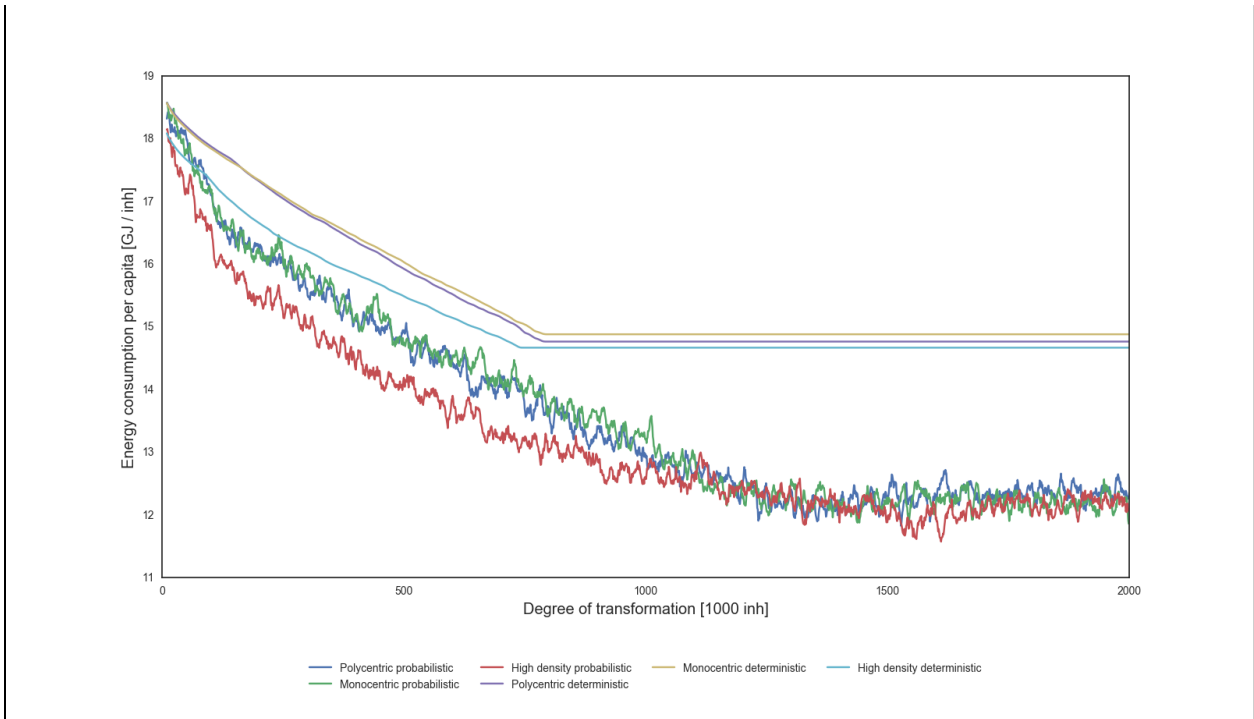

1

2 **Fig. 2.** The energy consumption for urban mobility per capita is reduced along the transformation  
 3 of the urban form. The deterministic approach does not account for uncertainty and its evolution  
 4 appears more stable, although its insights are limited compared to those of the probabilistic  
 5 approach, which helps overcoming non-convexities in the feasible space of the optimization  
 6 process, thus overcoming the limitations of a spatial explicit optimization in a changing urban  
 7 form.

8

9

10

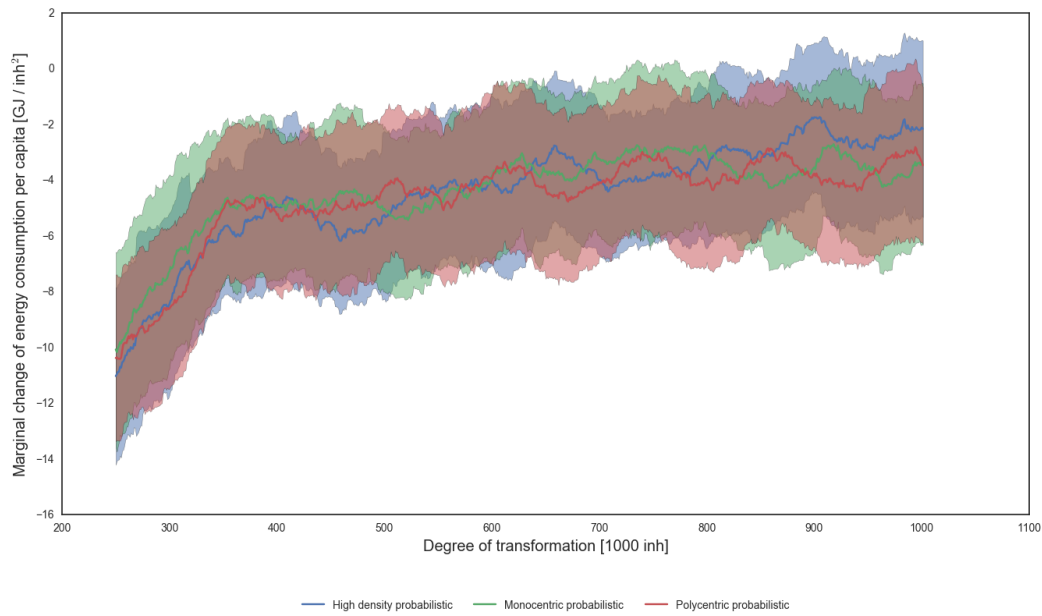

1

2 **Fig. 3.** The moving average (50 model steps) of the marginal contribution to energy consumption  
 3 for urban mobility of moving out 1,000 inhabitants in each model step in the probabilistic model  
 4 setting, and its standard deviation, do not visibly differ between city types. The overall trends  
 5 show the expected decreased returns of the transformation efforts along the model steps.  
 6

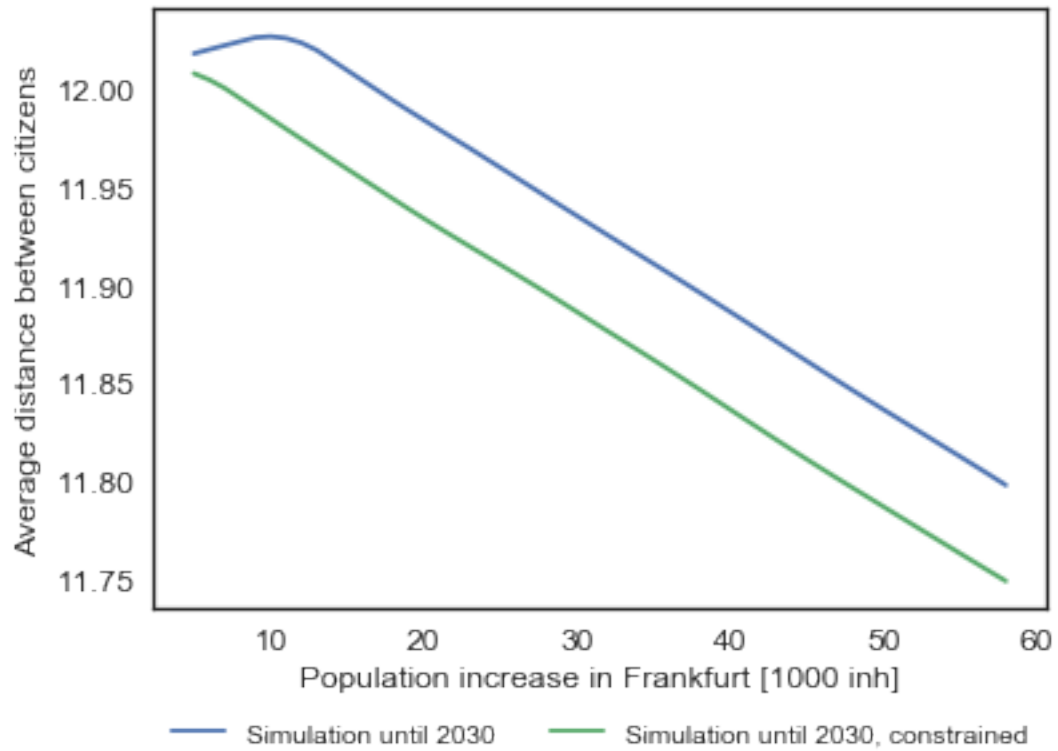

1

2 **Fig. 4.** Moving average (5 model steps) of the average distance between citizens along the model  
 3 runs minimising the energy consumption for urban mobility in Frankfurt.

4

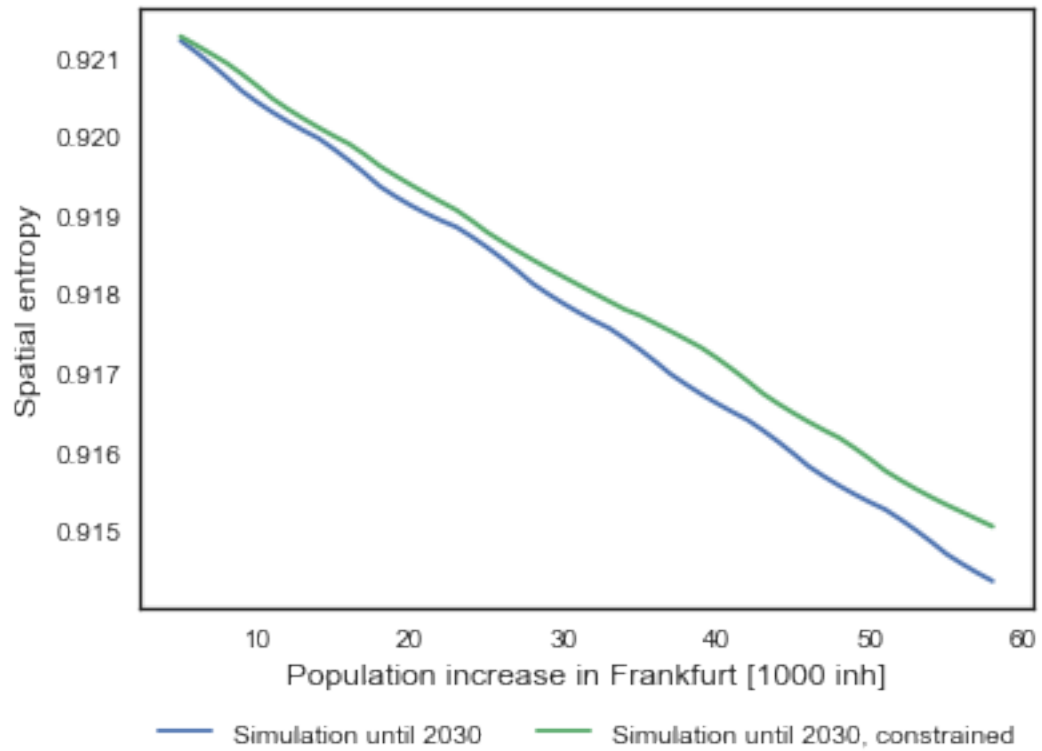

1

2 **Fig. 5.** Moving average (5 model steps) of the spatial entropy along the model runs minimising  
 3 the energy consumption for urban mobility in Frankfurt.

4

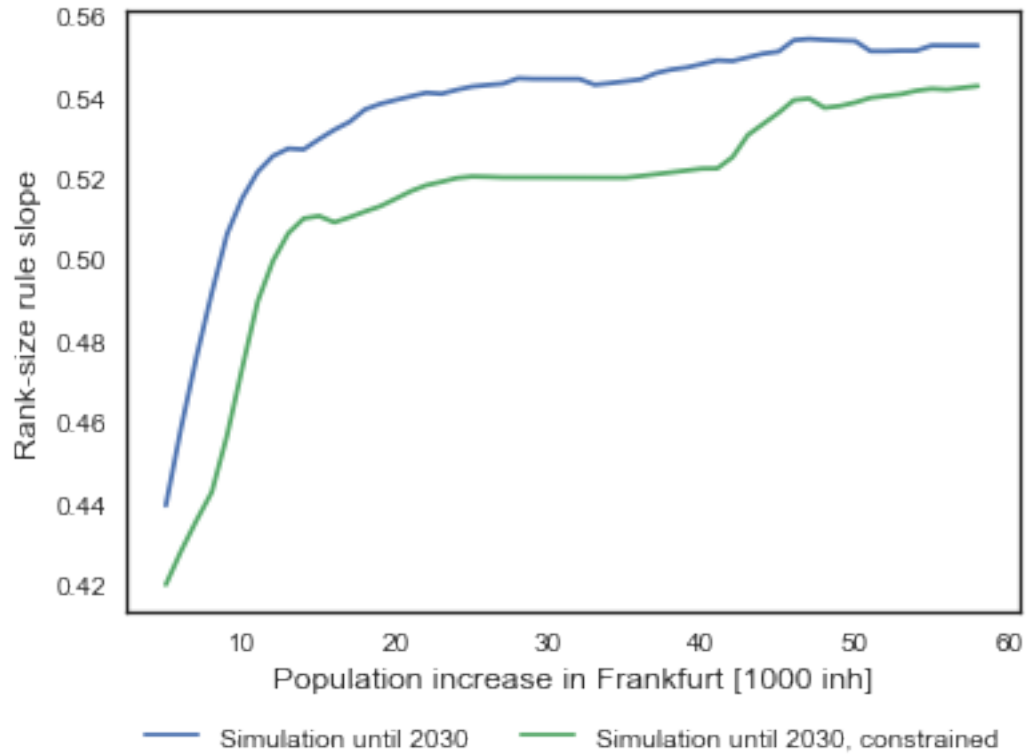

1

2 **Fig. 6.** Moving average (5 model steps) of the slope of the rank size rule along the model runs  
 3 minimising the energy consumption for urban mobility in Frankfurt.  
 4

1  
2

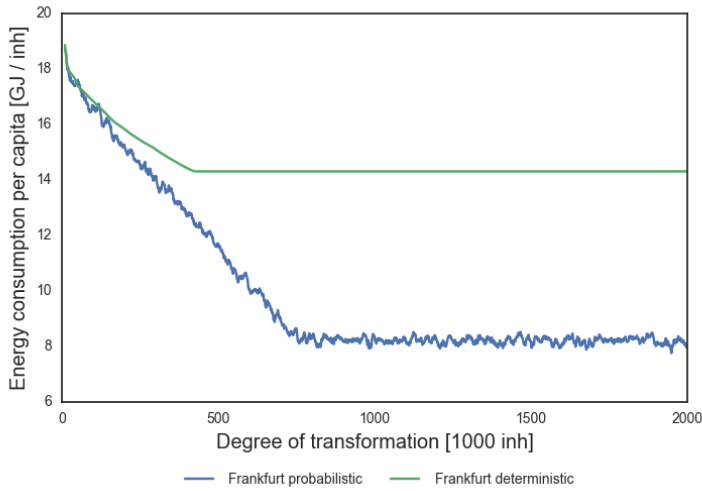

3

4 **Fig. 7.** Changes in energy consumption per capita along the transformation of the urban form of  
5 Frankfurt. The probabilistic approach creates some steps that punctually increase the energy  
6 consumption, still it overall doubles the decrease in energy consumption for transportation.  
7

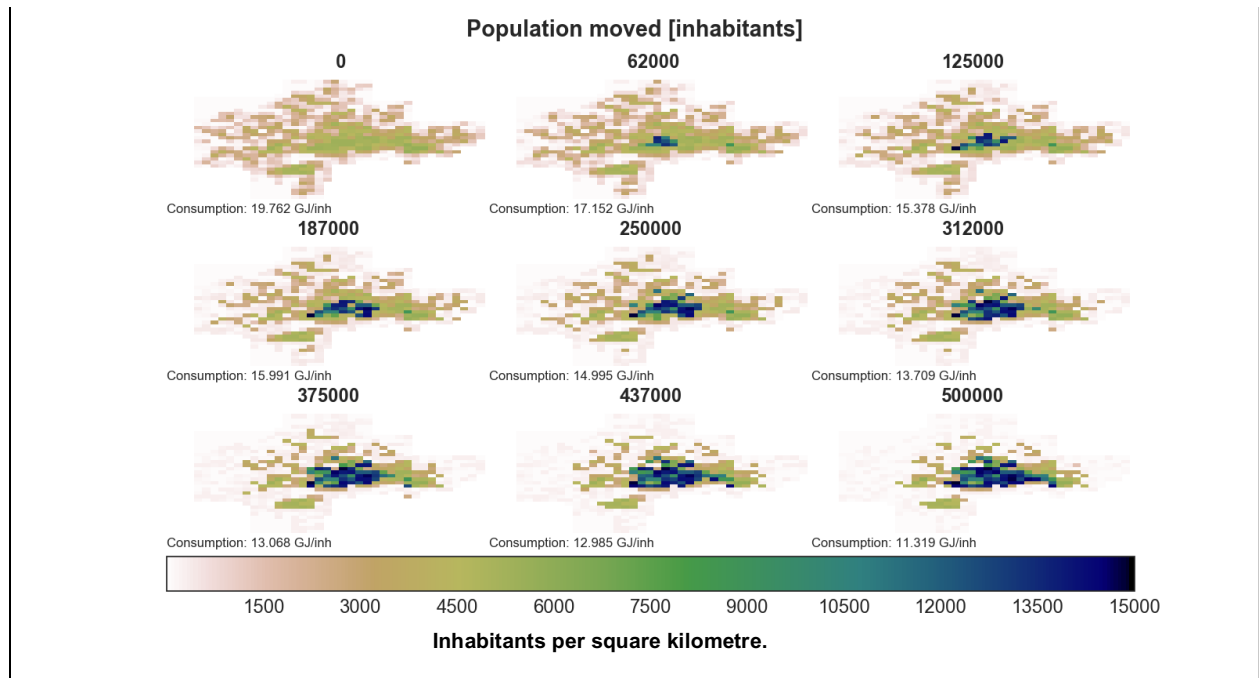

1

2

**Fig. 8.** Evolution of the transformation of the urban form of Frankfurt using the probabilistic approach. See movie S8 for more details.

3

4

5



1 **References:**

- 2 Batty, M.: Cities and complexity: Understanding cities with cellular automata, agent-based  
3 models, and fractals. MIT press, 2007.
- 4 Batty, M.: Spatial entropy. *Geographical Analysis*, 6(1), 1-31, 1974.
- 5 Betsill, M. M. and Bulkeley, H.: Cities and the Multilevel Governance of Global Climate  
6 Change. *Global Governance* 12, 2006.
- 7 Bren d'Amour, C., Reitsma, F., Baiocchi, G., Barthel, S., Guneralp, B., Erb, K. H., Haberl, H.,  
8 Creutzig and F., Seto, K. C.: Future urban land expansion and implications for global  
9 croplands. *Proc.Natl.Acad.Sci.U.S.A.*, 114(34), 8939-8944, 2017.
- 10 R. Burgess and Jenks, M.: *Compact cities: sustainable urban forms for developing countries*,  
11 Routledge, 2002.
- 12 Chen, Y. and Zhou, Y.: The rank-size rule and fractal hierarchies of cities: mathematical models  
13 and empirical analyses. *Environment and Planning B: Planning and Design* 30, 799-818,  
14 2003.
- 15 Clarke, K. C., Hoppen S. and Gaydos, L.: A self-modifying cellular automaton model of  
16 historical urbanization in the San Francisco Bay area. *Environment and planning B:*  
17 *Planning and design* 24 (2), 247-261, 1997.
- 18 Combs, T. S. and Rodríguez, D. A.: Joint impacts of Bus Rapid Transit and urban form on  
19 vehicle ownership: New evidence from a quasi-longitudinal analysis in Bogotá,  
20 Colombia. *Transportation Research Part A*, 69, 272–285, 2014.
- 21 Cremades. R.: *Climate Services for the Water-Energy-Land Nexus (CLISWELN)*, 2017,  
22 <http://www.jpi-climate.eu/nl/25223443-CLISWELN.html>.
- 23 EEA (European Environment Agency): *European Urban Atlas*, 2017,  
24 <http://www.eea.europa.eu/data-and-maps/data/urban-atlas>.
- 25 Eliasson, I.: The use of climate knowledge in urban planning. *Landscape Urban Plann.* 48(1), 31-  
26 44, 2000.
- 27 Ewing R. H.: Characteristics, causes, and effects of sprawl: A literature review. *Urban ecology*,  
28 21(2), 1-15, 2008.
- 29 Flyvbjerg, F.: Five Misunderstandings About Case-Study Research. *Qualitative Inquiry*, vol. 12,  
30 no. 2, pp. 219-245, 2006.
- 31 Forrester, J. W.: *Urban dynamics*. *Industrial Management Review*, 1970.
- 32 Fregolent, L., Vettoretto, L., Bottaro, M. and Curci, F.: The Urban Typologies within  
33 Contemporary Italian Urbanization. In: A. Balducci, V. Fedeli, F. Curci, F. (Eds.), *Post-*  
34 *Metropolitan Territories and Urban Space*, Routledge, 2017.
- 35 Freire, S., Kemper, T., Pesaresi, M., Florczyk, A. and Syrris, V.: Combining GHSL and GPW to  
36 improve global population mapping. 2015 IEEE International Geoscience and Remote  
37 Sensing Symposium (IGARSS), 2541-2543, 2015.
- 38 Geoportal Hessen: “HQextrem Überschwemmungsgrenzen\_kat0”, 2017,  
39 [www.geoportal.hessen.de](http://www.geoportal.hessen.de).

- 1 Hamin, E. M. and Gurrán, N.: Urban form and climate change: Balancing adaptation and  
2 mitigation in the US and Australia. *Habitat international*, 33(3), 238-245, 2009.
- 3 Hooghe, L. and Marks, G.: Unraveling the central state, but how? Types of multi-level  
4 governance. *Am. Polit. Sci. Rev.* 97(2), 233-243, 2003.
- 5 Hunter, J. D.: Matplotlib: A 2D Graphics Environment Computing in Science Engineering, 9,  
6 90-95, 2007.
- 7 Jones, B. and O'Neill, B. C.: Spatially explicit global population scenarios consistent with the  
8 Shared Socioeconomic Pathways. *Environ. Res. Lett.* 11, 2016.
- 9 Jones, E., Oliphant, T. and Peterson, P.: SciPy: Open source scientific tools for Python, 2001,  
10 <http://www.scipy.org/>.
- 11 Karsten, L. and van Vliet, W.: Children in the city: Reclaiming the street. *Child. Youth Environ*  
12 16(1), 151-167, 2006.
- 13 Kennedy, R. J. and Buys, L.: Dimensions of liveability: a tool for sustainable cities. Proceedings  
14 of SB10mad Sustainable Building Conference, Madrid, 2010.
- 15 Koch, A., Girard, S. and McKoen, K.: Towards a neighbourhood scale for low- or zero-carbon  
16 building projects. *Building Research & Information* 40(4), 527-537, 2012.
- 17 Le Néchet, F.: Urban spatial structure, daily mobility and energy consumption: A study of 34  
18 european cities. *Cybergeog: European Journal of Geography*, 2012.
- 19 Leung, D. Y. C. and Yang, Y.: Wind energy development and its environmental impact: A  
20 review. *Renew. Sustainable Energy Rev.* 16(1), 1031-1039, 2012.
- 21 Li, Z., Quan, S. J. and Yang, P. P. J.: Energy performance simulation for planning a low carbon  
22 neighborhood urban district: A case study in the city of Macau. *Habitat International* 53,  
23 206-214, 2016.
- 24 Lipper, L. Thornton, P., Campbell, B. M., Baedeker, T., Braimoh, A., Bwalya, M., Caron, P.,  
25 Cattaneo, A., Garrity, D., and Henry, K., Climate-smart agriculture for food security.  
26 *Nature Climate Change* 4(12), 1068-1072, 2014.
- 27 Liu, X. and Sweeney, J.: Modeling the impact of urban form on household energy demand and  
28 related CO<sub>2</sub> emissions in the Greater Dublin Region. *Energy Policy* 46, 359–369, 2012.
- 29 Lohrey, S. and Creutzig, F.: A ‘sustainability window’ of urban form. *Transportation Research*  
30 *Part D: Transport and Environment*, 45, 96-111, 2016.
- 31 Loorbach, D. and Shiroyama, H.: The Challenge of Sustainable Urban Development and  
32 Transforming Cities. In: Loorbach D., Wittmayer J., Shiroyama H., Fujino J., Mizuguchi  
33 S. (Eds.), *Governance of Urban Sustainability Transitions*, Springer, 2016.
- 34 McNamara, K. E., Bronen, R., Fernando, N. and Klepp, S.: The complex decision-making of  
35 climate-induced relocation: adaptation and loss and damage. *Climate Policy* 1-7, 2016.
- 36 Moreno, E., Arimah, B., Otieno, R., Mbeche-Smith, U., Klen-Amin, A. and Kamiya, M.: *World*  
37 *Cities Report*. (United Nations Human Settlements Programme, 2016.
- 38 Nevens, F., Frantzeskaki, N., Gorissen, L. and Loorbach, D.: Urban Transition Labs: Co-creating  
39 transformative action for sustainable cities. *J Clean Prod.* 50, 111-122, 2013.

- 1 Nilsson, B.: Ideology, environment and forced relocation: Kiruna – a town on the move. Eur  
2 Urban Reg Stud. 17(4), 433-442, 2010.
- 3 Nilsson, M., Griggs, D. and Visbeck, M.: Map the interactions between sustainable development  
4 goals. Nature 534(7607), 320, 2016.
- 5 Noordegraaf, D. V., Annema, J.A. and Wee, B. van: Policy implementation lessons from six  
6 road pricing cases. Transportation Research Part A, 59, 172–191, 2014.
- 7 Pan, W.: System boundaries of zero carbon buildings. Renew. Sustainable Energy Rev. 37, 424-  
8 434, 2014.
- 9 Pentland, A.: Social physics: How good ideas spread-the lessons from a new science, Penguin,  
10 2014.
- 11 Petz, D.: Planned Relocations in the Context of Natural Disasters and Climate Change: a Review  
12 of the Literature, Brookings Institution, 2015.
- 13 Raccuja, G. and Better, M.: A distance-based charge to replace Fuel Duty and VED, collected by  
14 insurers, 2017, [https://policyexchange.org.uk/wp-content/uploads/2017/07/Gergely-  
15 Raccuja-Miles-Better-Revised-Submission.pdf](https://policyexchange.org.uk/wp-content/uploads/2017/07/Gergely-Raccuja-Miles-Better-Revised-Submission.pdf).
- 16 Robertson, S. and Blackwell, B.: Remote mining towns on the rangelands: determining  
17 dependency within the hinterland. The Rangeland Journal 37(6), 583-596, 2016.
- 18 Schilling, J. and Logan, J.: Greening the rust belt: A green infrastructure model for right sizing  
19 America's shrinking cities. J Am Plann Assoc. 74(4), 451-466, 2008.
- 20 Seabold, S. and Perktold, J.: Statsmodels: Econometric and statistical modeling with python 9th  
21 Python in Science Conference, 2010.
- 22 Seto, K. C., Dhakal, S., Bigio, A., Blanco, H., Delgado, G. C., Dewar, D., Huang, L., Inaba, A.,  
23 Kansal, A. and Lwasa, S.: Human Settlements, Infrastructure and Spatial Planning. In:  
24 Edenhofer, O., Pichs-Madruga, R., Sokona, Y., Farahani, E., Kadner, S., Seyboth, K.,  
25 Adler, A., Baum, I., Brunner, S. and Eickemeier P. (Eds.): Climate Change 2014:  
26 Mitigation of Climate Change. Contribution of Working Group III to the Fifth  
27 Assessment Report of the Intergovernmental Panel on Climate Change, Cambridge UP,  
28 2014.
- 29 Shriver, T. E. and Kennedy, D. K.: Contested environmental hazards and community conflict  
30 over relocation. Rural Sociol., 70 (4), 491-513, 2005.
- 31 Sommer, P. S.: The pyplot interactive visualization framework The Journal of Open Source  
32 Software, The Open Journal, 2, 2017.
- 33 UITP (International Association of Public Transport, “Union Internationale des Transports  
34 Publics”): Mobility in Cities Database, 2015, <http://www.uitp.org/MCD>.
- 35 UN (United Nations): Department of Economic and Social Affairs, Population Division. World  
36 Urbanization Prospects: The 2014 Revision, CD-ROM Edition., 2014.
- 37 USCGRP (U.S. Global Change Research Program): National Climate Assessment. Urban  
38 Systems, Infrastructure, and Vulnerability, 2014,  
39 [nca2014.globalchange.gov/report/sectors/urban](http://nca2014.globalchange.gov/report/sectors/urban).

1 White, R.: Cities and cellular automata. *Discrete dynamics in Nature and Society*, 2, 111-125,  
2 1998.

3 Wong, D. W. S. and Fotheringham, A. S.: Urban Systems as Examples of Bounded Chaos:  
4 Exploring the Relationship between Fractal Dimension, Rank-Size, and Rural-to-Urban  
5 Migration. *Geografiska Annaler. Series B, Human Geography* 72 (2/3), 89-99, 1990.

6 Zhenling, L.: Fractal theory and application in city size distribution. *Information Technology*  
7 *Journal*, 12(17), 4158-4162, 2013.

8 Zuo, J., Read, B., Pullen, S. and Shi, Q.: Carbon-neutral commercial building development. *J.*  
9 *Manag. Eng.* 29(1), 95–102, 2013.

10

11
